# Supplementary material for: Highly enhanced leukemia therapy and oral bioavailability from a novel amphiphilic prodrug of cytarabine
Source: Royal Society of Chemistry journal article supplement (doi:10.1039/c6ra02051h), 2016-01-01
Supplement: c6ra02051h1.pdf [file c6ra02051h1.pdf]

## Supplementary Information

### **Highly enhanced leukemia therapy and oral bioavailability from a novel amphiphilic prodrug of cytarabine**

Jing Liu<sup>a, 1</sup>, Jing Liu<sup>ab, 1</sup>, Dajuan Zhao<sup>a</sup>, Naxin Ma<sup>a</sup> and Yuxia Luan<sup>a\*</sup>

*<sup>a</sup>School of Pharmaceutical Science, Shandong University, 44 West Wenhua Road, Jinan, Shandong Province, 250012, P. R. China. Fax: (86) 531-88382548; Tel: (86) 531-88382007; E-mail: yuxialuan@sdu.edu.cn*

*<sup>b</sup>Chia Tai Tian Qing Pharmaceutical Group Co., Ltd., Lianyungang, Jiangsu Province, 222000, P. R. China*

*<sup>1</sup>These authors contributed equally to this work.*

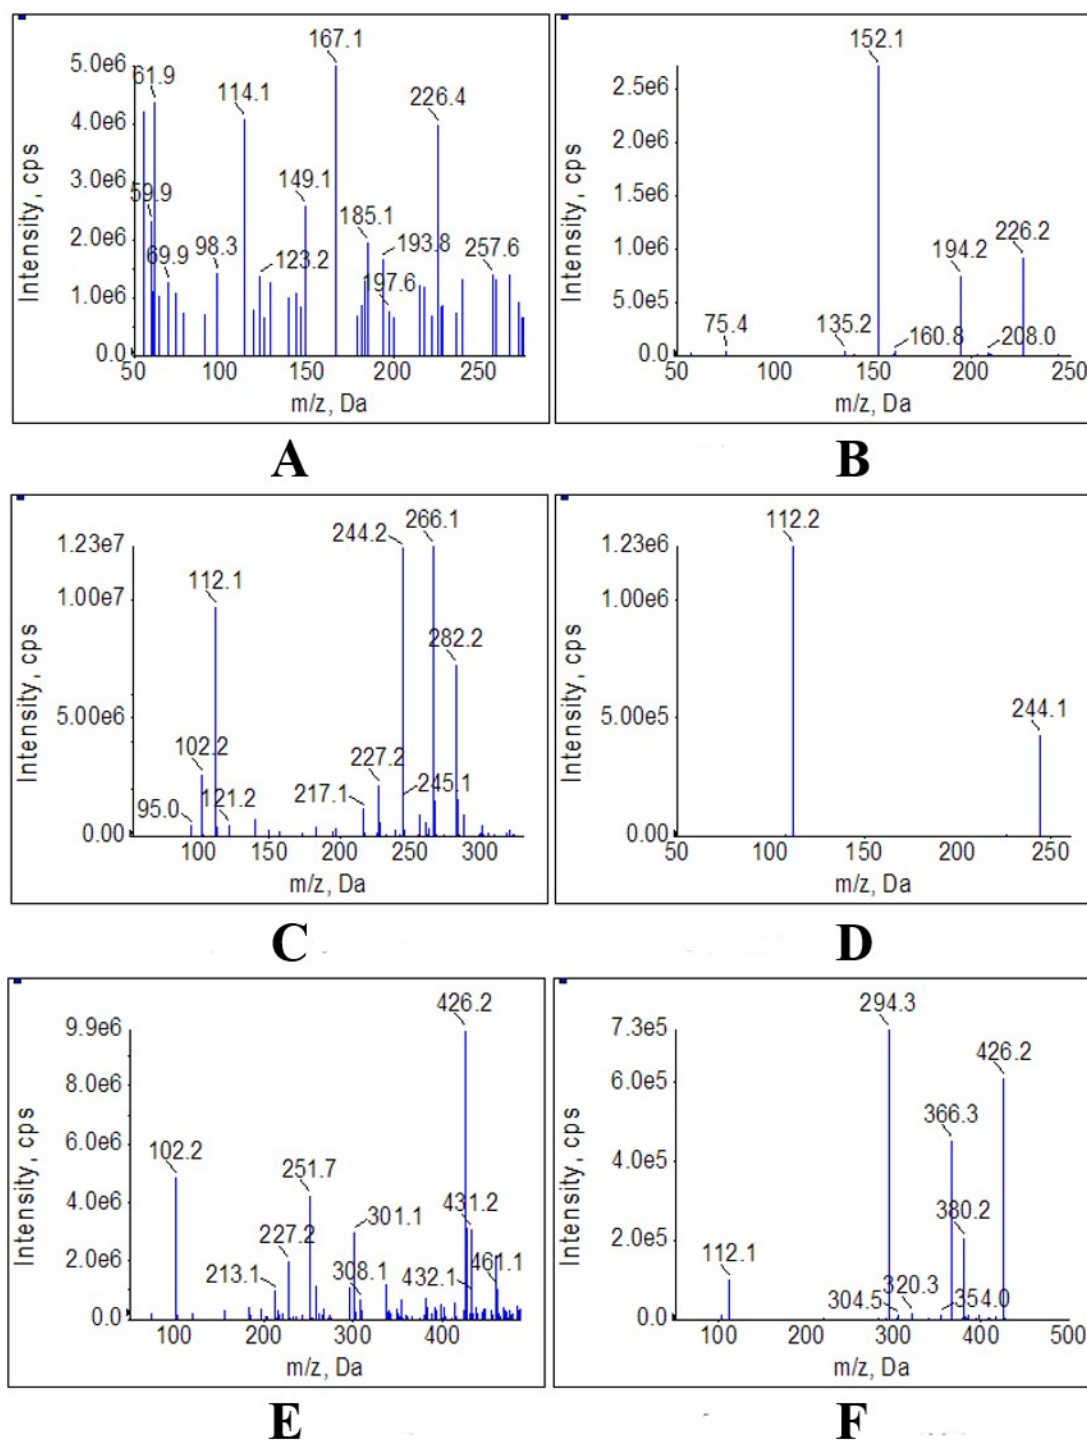

**Fig. S1** The first order mass chromatogram (left) and second stage of mass chromatogram (right) of internal standard preparation acyclovir (A, B), cytarabine (C, D) and LA-Ara (E, F).

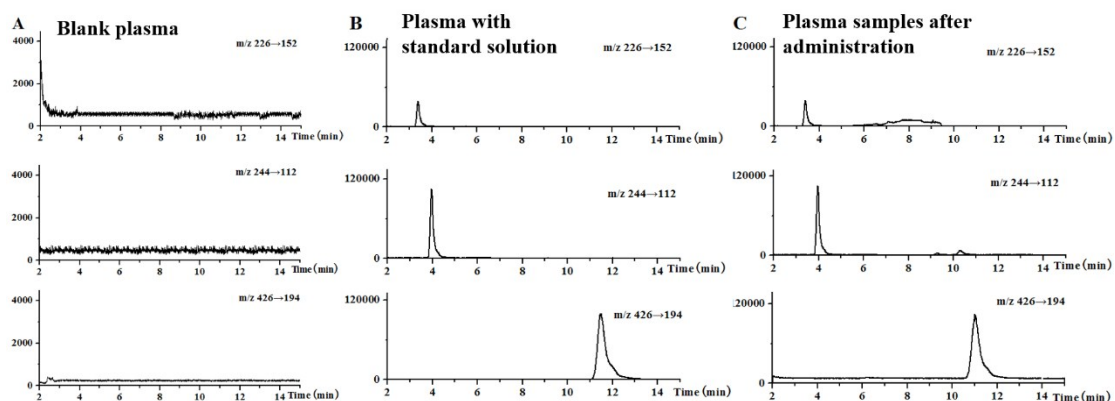

**Fig. S2** Representative MRM chromatograms of acyclovir (m/z 226→152), cytarabine (m/z 244→112) and LA-Ara(m/z 426→294) in rat plasma samples.

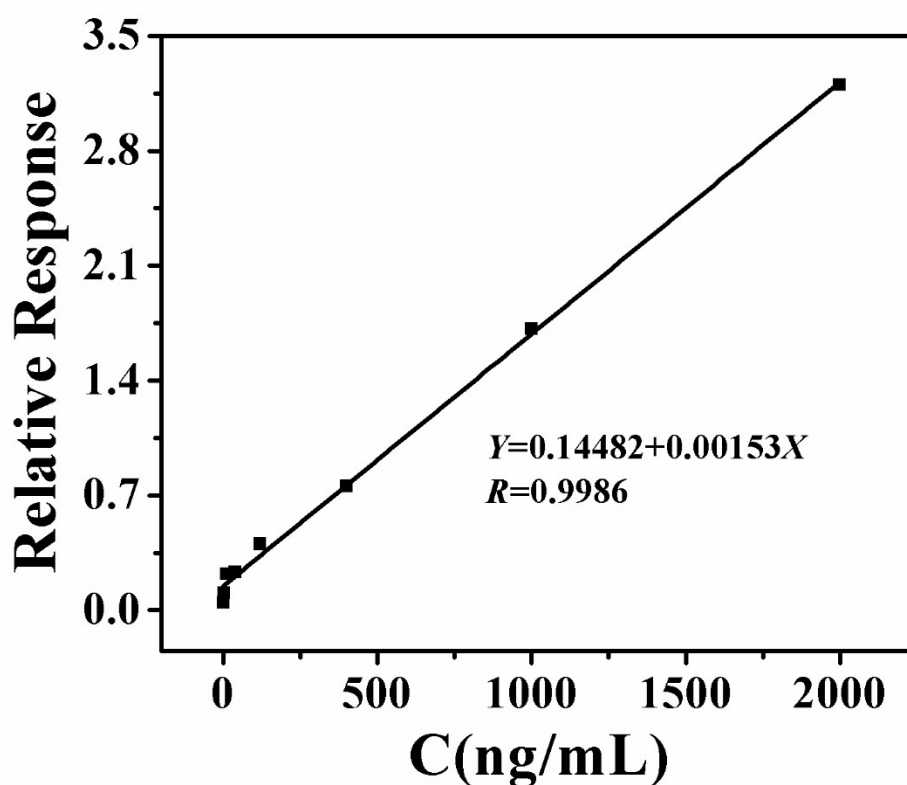

**Fig. S3** Standard curve of Ara-C in the plasma of rats. Linear relationship is well within concentration of Ara-C range from 1.2 to 2000 ng·mL<sup>-1</sup>.

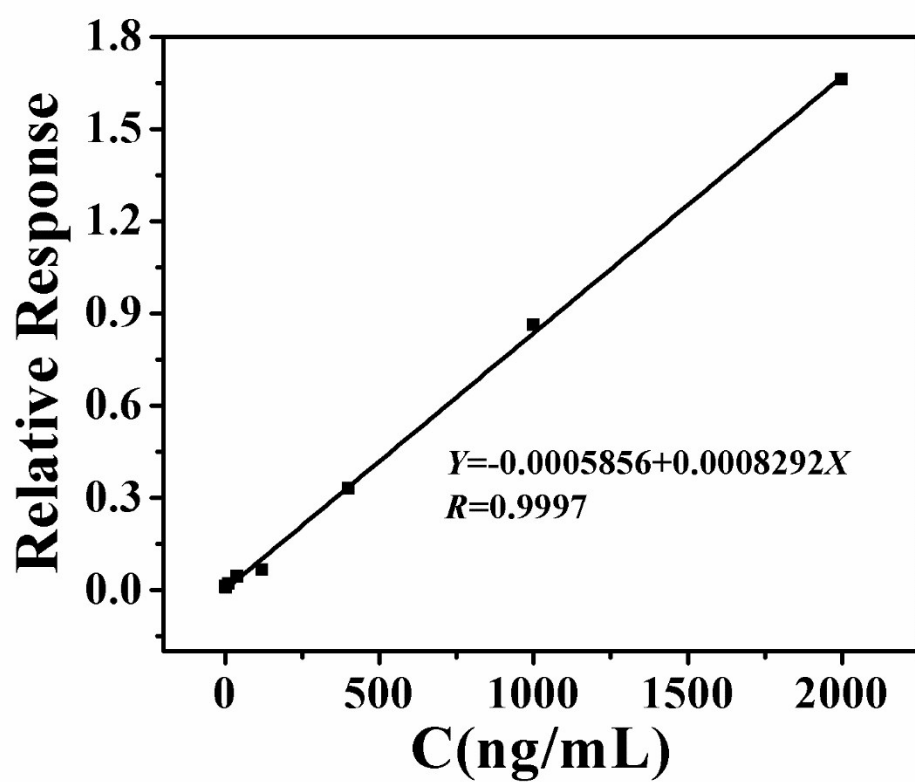

**Fig. S4** Standard curve of LA-Ara in the plasma of rats. Linear relationship is well within concentration of LA-Ara range from 1.2 to 2000 ng·mL<sup>-1</sup>.

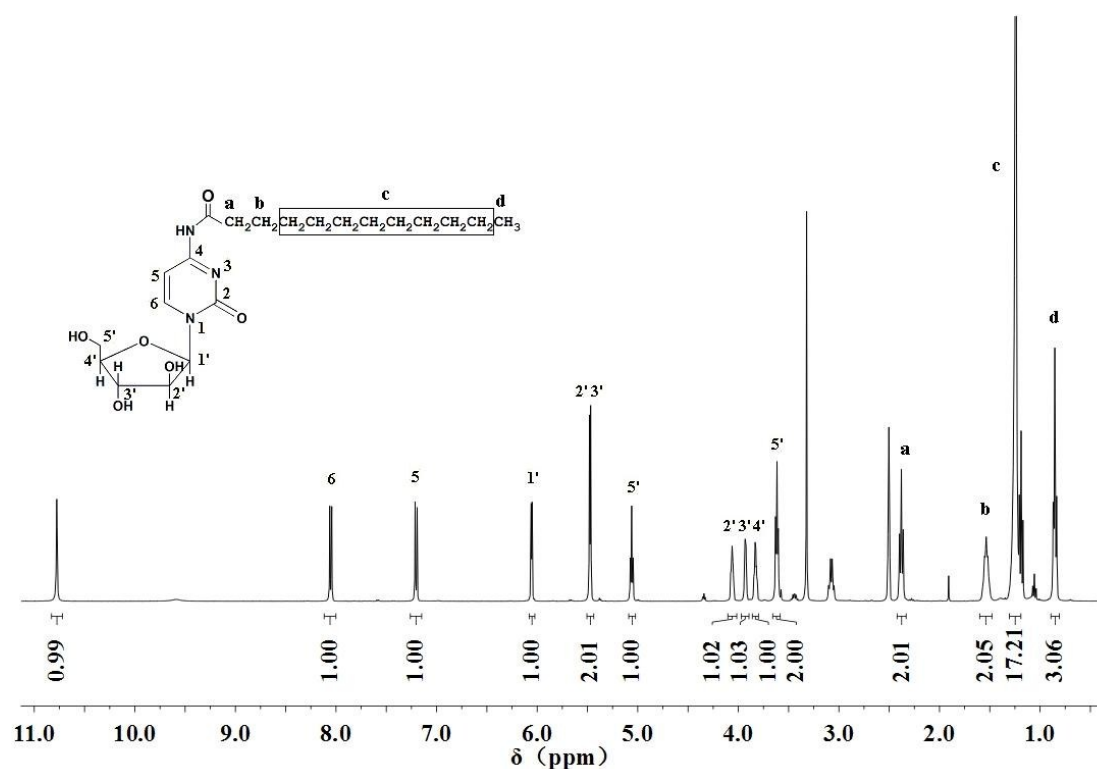

**Fig. S5** <sup>1</sup>H-NMR spectra of LA-Ara prodrug and the integral area values of peaks have been given under peak.

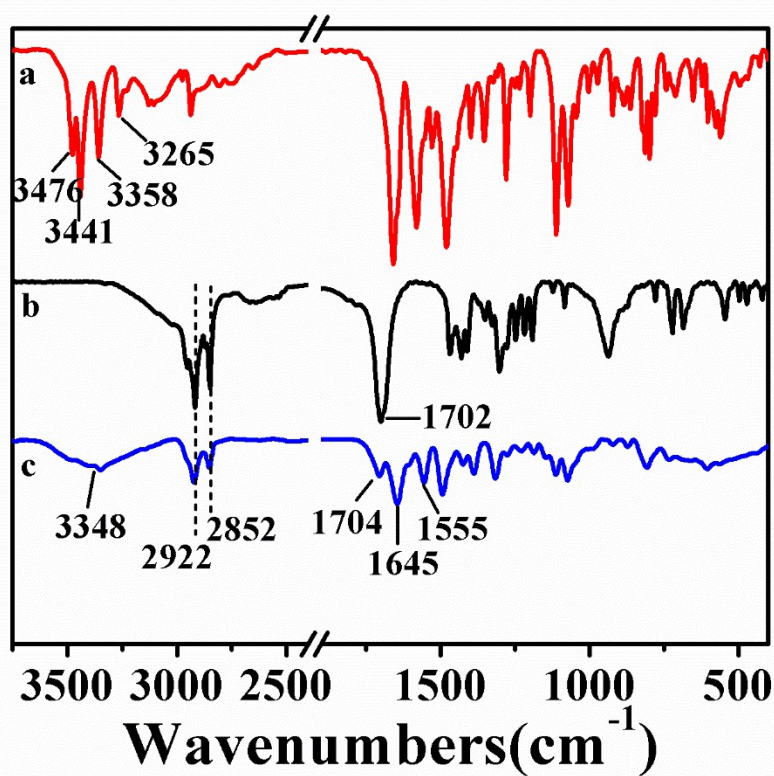

**Fig. S6** FTIR spectra of Ara-C (a), LA (b) and LA-Ara (c)

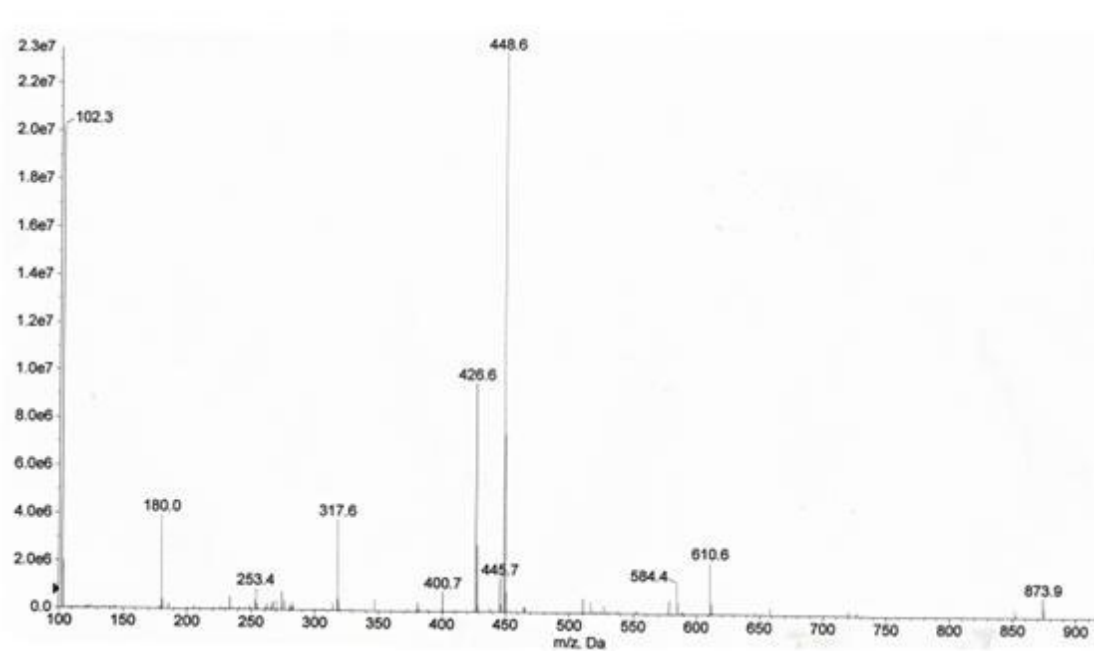

**Fig. S7** Mass spectra of prodrug LA-Ara

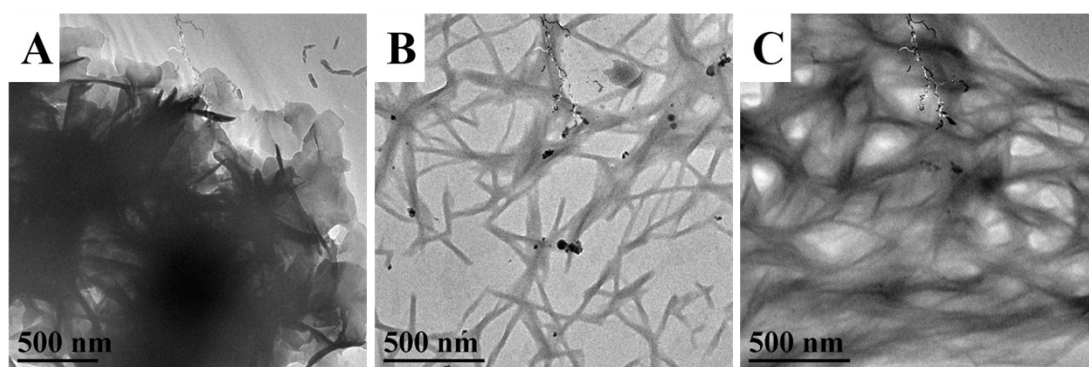

**Fig. S8** TEM images of LA-Ara nanofibers after incubation for 6h at pH 1.2 (A), 4.5 (B) and 6.8 (C)

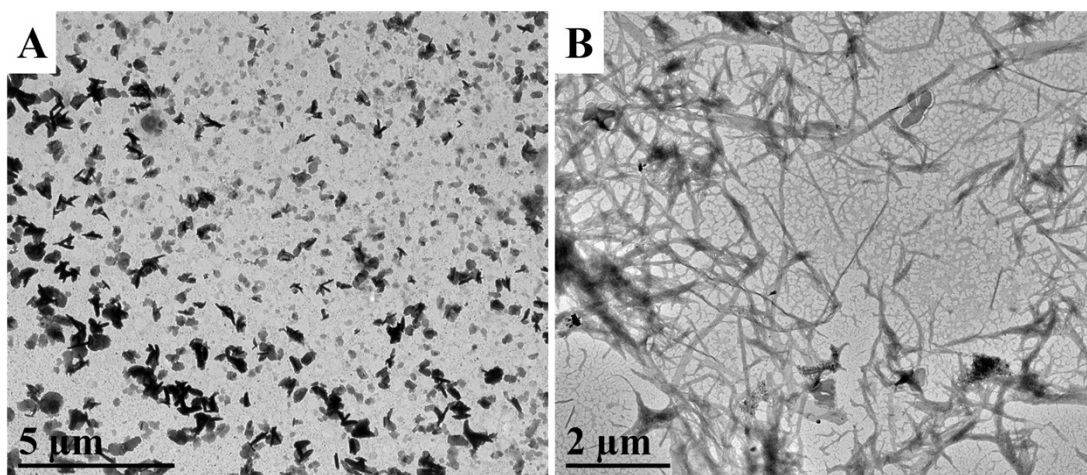

**Fig. S9** TEM images of LA-Ara nanofibers after incubation at artificial gastric juice for 2 h (A) and at artificial intestinal fluid for 4 h (B).
